# Supplementary material for: Assessment of the genomic prediction accuracy for feed efficiency traits in meat-type chickens
Source: PLoS One. 2017 Mar 9;12(3):e0173620. doi: 10.1371/journal.pone.0173620 (PMC5344482; doi:10.1371/journal.pone.0173620)
Supplement: S1 Table — The accuracies of genomic prediction were evaluated in two ways: the correlation-based accuracy and model-based theoretical accuracy. (XLSX) [file pone.0173620.s001.xlsx]

## Sheet: Table S1
Table S1. Accuracy of genomic predictions for the birds in the test sets of the cross-validation
Scenario1	Repetition	ADG2	ADFI	FCR	RFI	Scenario	Repetition	ADG	ADFI	FCR	RFI	Scenario	Repetition	ADG	ADFI	FCR	RFI
rcor_CVF	1#	0.596	0.531	0.411	0.277	rtheo_CVF	1#	0.39	0.368	0.491	0.396	rped_CVF	1#	-0.083	-0.132	0.193	0.213
rcor_CVF	2#	0.565	0.506	0.396	0.263	rtheo_CVF	2#	0.381	0.346	0.413	0.404	rped_CVF	2#	-0.086	-0.101	0.1	0.162
rcor_CVF	3#	0.562	0.538	0.307	0.373	rtheo_CVF	3#	0.397	0.369	0.501	0.412	rped_CVF	3#	-0.059	-0.128	0.099	0.105
rcor_CVF	4#	0.538	0.489	0.361	0.274	rtheo_CVF	4#	0.425	0.403	0.269	0.426	rped_CVF	4#	-0.089	-0.095	0.316	0.111
rcor_CVF	5#	0.625	0.56	0.359	0.26	rtheo_CVF	5#	0.403	0.398	0.464	0.419	rped_CVF	5#	0.07	0.081	0.19	0.233
rcor_CVF	6#	0.606	0.576	0.366	0.297	rtheo_CVF	6#	0.39	0.377	0.475	0.396	rped_CVF	6#	-0.001	0.095	0.158	0.182
rcor_CVF	7#	0.526	0.477	0.364	0.277	rtheo_CVF	7#	0.421	0.396	0.273	0.426	rped_CVF	7#	-0.041	-0.04	0.285	0.098
rcor_CVF	8#	0.592	0.524	0.337	0.278	rtheo_CVF	8#	0.392	0.385	0.524	0.42	rped_CVF	8#	-0.039	-0.143	0.201	0.233
rcor_CVF	9#	0.579	0.495	0.378	0.288	rtheo_CVF	9#	0.424	0.425	0.385	0.425	rped_CVF	9#	-0.026	-0.113	0.363	0.131
rcor_CVF	10#	0.546	0.51	0.324	0.253	rtheo_CVF	10#	0.387	0.358	0.407	0.417	rped_CVF	10#	-0.1	-0.102	0.119	0.189
rcor_CVF	Mean	0.574	0.52	0.36	0.284	rtheo_CVF	Mean	0.401	0.383	0.42	0.414	rped_CVF	Mean	-0.045	-0.068	0.202	0.166
rcor_CVR	1#	0.605	0.653	0.43	0.578	rtheo_CVR	1#	0.616	0.633	0.556	0.613	rped_CVR	1#	0.072	0.28	0.205	0.422
rcor_CVR	2#	0.572	0.635	0.378	0.557	rtheo_CVR	2#	0.629	0.64	0.534	0.62	rped_CVR	2#	0.054	0.232	0.195	0.429
rcor_CVR	3#	0.561	0.608	0.489	0.646	rtheo_CVR	3#	0.625	0.634	0.601	0.649	rped_CVR	3#	0.093	0.24	0.242	0.436
rcor_CVR	4#	0.571	0.63	0.428	0.568	rtheo_CVR	4#	0.64	0.646	0.582	0.616	rped_CVR	4#	0.106	0.252	0.206	0.395
rcor_CVR	5#	0.501	0.586	0.454	0.654	rtheo_CVR	5#	0.615	0.631	0.601	0.641	rped_CVR	5#	0.1	0.208	0.219	0.39
rcor_CVR	6#	0.608	0.667	0.465	0.576	rtheo_CVR	6#	0.639	0.65	0.569	0.63	rped_CVR	6#	0.109	0.252	0.221	0.345
rcor_CVR	7#	0.625	0.657	0.489	0.603	rtheo_CVR	7#	0.639	0.645	0.602	0.629	rped_CVR	7#	0.096	0.227	0.26	0.399
rcor_CVR	8#	0.533	0.602	0.342	0.547	rtheo_CVR	8#	0.617	0.623	0.536	0.623	rped_CVR	8#	0.133	0.249	0.221	0.383
rcor_CVR	9#	0.548	0.594	0.404	0.541	rtheo_CVR	9#	0.608	0.621	0.528	0.603	rped_CVR	9#	0.146	0.259	0.283	0.416
rcor_CVR	10#	0.605	0.671	0.491	0.61	rtheo_CVR	10#	0.645	0.644	0.591	0.628	rped_CVR	10#	0.109	0.255	0.279	0.429
rcor_CVR	11#	0.571	0.626	0.405	0.566	rtheo_CVR	11#	0.617	0.628	0.55	0.617	rped_CVR	11#	0.087	0.223	0.221	0.38
rcor_CVR	12#	0.593	0.631	0.539	0.602	rtheo_CVR	12#	0.631	0.638	0.616	0.643	rped_CVR	12#	0.12	0.254	0.266	0.372
rcor_CVR	13#	0.559	0.637	0.389	0.62	rtheo_CVR	13#	0.638	0.649	0.538	0.644	rped_CVR	13#	0	0.205	0.117	0.365
rcor_CVR	14#	0.588	0.639	0.437	0.615	rtheo_CVR	14#	0.633	0.637	0.577	0.632	rped_CVR	14#	0.084	0.185	0.214	0.38
rcor_CVR	15#	0.593	0.634	0.539	0.642	rtheo_CVR	15#	0.635	0.643	0.602	0.631	rped_CVR	15#	0.174	0.294	0.279	0.463
rcor_CVR	16#	0.569	0.608	0.472	0.63	rtheo_CVR	16#	0.624	0.63	0.601	0.637	rped_CVR	16#	0.149	0.284	0.255	0.47
rcor_CVR	17#	0.549	0.606	0.472	0.619	rtheo_CVR	17#	0.634	0.639	0.578	0.63	rped_CVR	17#	0.02	0.161	0.219	0.422
rcor_CVR	18#	0.535	0.602	0.383	0.552	rtheo_CVR	18#	0.623	0.634	0.535	0.613	rped_CVR	18#	0.11	0.225	0.247	0.395
rcor_CVR	19#	0.568	0.613	0.42	0.606	rtheo_CVR	19#	0.633	0.646	0.56	0.62	rped_CVR	19#	0.063	0.223	0.247	0.442
rcor_CVR	20#	0.585	0.641	0.348	0.572	rtheo_CVR	20#	0.643	0.645	0.588	0.617	rped_CVR	20#	0.107	0.262	0.151	0.369
rcor_CVR	21#	0.583	0.666	0.433	0.63	rtheo_CVR	21#	0.642	0.655	0.585	0.654	rped_CVR	21#	0.053	0.203	0.219	0.376
rcor_CVR	22#	0.603	0.606	0.485	0.569	rtheo_CVR	22#	0.639	0.639	0.6	0.64	rped_CVR	22#	0.079	0.201	0.156	0.27
rcor_CVR	23#	0.526	0.593	0.457	0.591	rtheo_CVR	23#	0.621	0.632	0.57	0.62	rped_CVR	23#	0.112	0.266	0.251	0.432
rcor_CVR	24#	0.591	0.602	0.55	0.544	rtheo_CVR	24#	0.643	0.644	0.604	0.609	rped_CVR	24#	0.114	0.227	0.32	0.4
rcor_CVR	25#	0.579	0.62	0.331	0.512	rtheo_CVR	25#	0.629	0.634	0.481	0.61	rped_CVR	25#	0.124	0.223	0.231	0.376
rcor_CVR	26#	0.561	0.606	0.454	0.582	rtheo_CVR	26#	0.612	0.629	0.574	0.629	rped_CVR	26#	0.14	0.263	0.244	0.417
rcor_CVR	27#	0.565	0.635	0.428	0.576	rtheo_CVR	27#	0.623	0.632	0.558	0.608	rped_CVR	27#	0.036	0.211	0.258	0.409
rcor_CVR	28#	0.616	0.651	0.482	0.612	rtheo_CVR	28#	0.639	0.647	0.592	0.633	rped_CVR	28#	0.112	0.229	0.273	0.39
rcor_CVR	29#	0.651	0.679	0.519	0.63	rtheo_CVR	29#	0.65	0.653	0.616	0.635	rped_CVR	29#	0.077	0.259	0.188	0.39
rcor_CVR	30#	0.568	0.62	0.415	0.571	rtheo_CVR	30#	0.621	0.637	0.591	0.617	rped_CVR	30#	0.099	0.247	0.229	0.415
rcor_CVR	31#	0.569	0.611	0.383	0.586	rtheo_CVR	31#	0.621	0.625	0.546	0.622	rped_CVR	31#	0.119	0.24	0.257	0.388
rcor_CVR	32#	0.586	0.644	0.435	0.619	rtheo_CVR	32#	0.641	0.654	0.588	0.653	rped_CVR	32#	0.132	0.255	0.218	0.297
rcor_CVR	33#	0.568	0.613	0.448	0.585	rtheo_CVR	33#	0.639	0.648	0.559	0.621	rped_CVR	33#	0.127	0.263	0.264	0.427
rcor_CVR	34#	0.601	0.645	0.379	0.583	rtheo_CVR	34#	0.637	0.648	0.57	0.633	rped_CVR	34#	0.113	0.204	0.069	0.366
rcor_CVR	35#	0.605	0.641	0.472	0.612	rtheo_CVR	35#	0.641	0.648	0.611	0.647	rped_CVR	35#	0.132	0.244	0.179	0.352
rcor_CVR	36#	0.556	0.608	0.391	0.562	rtheo_CVR	36#	0.625	0.633	0.573	0.621	rped_CVR	36#	0.016	0.179	0.143	0.433
rcor_CVR	37#	0.575	0.601	0.431	0.562	rtheo_CVR	37#	0.628	0.636	0.529	0.627	rped_CVR	37#	0.133	0.194	0.281	0.363
rcor_CVR	38#	0.618	0.649	0.491	0.66	rtheo_CVR	38#	0.633	0.638	0.597	0.655	rped_CVR	38#	0.124	0.259	0.249	0.405
rcor_CVR	39#	0.576	0.611	0.495	0.595	rtheo_CVR	39#	0.618	0.626	0.592	0.639	rped_CVR	39#	0.136	0.248	0.322	0.388
rcor_CVR	40#	0.624	0.679	0.502	0.619	rtheo_CVR	40#	0.631	0.641	0.582	0.642	rped_CVR	40#	0.163	0.254	0.311	0.439
rcor_CVR	41#	0.569	0.595	0.508	0.603	rtheo_CVR	41#	0.62	0.622	0.593	0.64	rped_CVR	41#	0.089	0.244	0.238	0.348
rcor_CVR	42#	0.592	0.639	0.431	0.549	rtheo_CVR	42#	0.636	0.646	0.579	0.637	rped_CVR	42#	0.061	0.259	0.247	0.379
rcor_CVR	43#	0.578	0.626	0.448	0.596	rtheo_CVR	43#	0.624	0.629	0.577	0.632	rped_CVR	43#	0.056	0.237	0.182	0.409
rcor_CVR	44#	0.613	0.617	0.47	0.568	rtheo_CVR	44#	0.645	0.638	0.585	0.617	rped_CVR	44#	0.087	0.223	0.288	0.416
rcor_CVR	45#	0.593	0.641	0.459	0.618	rtheo_CVR	45#	0.644	0.642	0.629	0.637	rped_CVR	45#	0.046	0.233	0.134	0.388
rcor_CVR	46#	0.571	0.606	0.448	0.612	rtheo_CVR	46#	0.625	0.641	0.534	0.641	rped_CVR	46#	0.09	0.2	0.251	0.436
rcor_CVR	47#	0.595	0.635	0.517	0.576	rtheo_CVR	47#	0.631	0.64	0.622	0.64	rped_CVR	47#	0.173	0.28	0.283	0.403
rcor_CVR	48#	0.608	0.649	0.444	0.583	rtheo_CVR	48#	0.63	0.637	0.58	0.623	rped_CVR	48#	0.097	0.234	0.242	0.426
rcor_CVR	49#	0.558	0.6	0.48	0.622	rtheo_CVR	49#	0.629	0.639	0.569	0.634	rped_CVR	49#	0.009	0.167	0.242	0.412
rcor_CVR	50#	0.621	0.628	0.472	0.589	rtheo_CVR	50#	0.639	0.634	0.6	0.622	rped_CVR	50#	0.156	0.266	0.281	0.436
rcor_CVR	Mean	0.581	0.627	0.449	0.593	rtheo_CVR	Mean	0.631	0.638	0.577	0.629	rped_CVR	Mean	0.099	0.236	0.232	0.398
1rcor = the correlation between genomic prediction and corrected phenotypic value divided by the square root of heritability
rtheo = model-based theoretical accuracy of genomic predictions calculated by inverting the coefficient matrix of the mixed model equations
rped = the correlation between pedigree prediction and corrected phenotypic value divided by the square root of heritability
CVF = the test sets of the cross-validation by random family sampling
CVR = the test sets of the cross-validation by random individual sampling
2ADG = average daily gain
ADFI = average daily feed intake
FCR = feed conversion ratio
RFI = residual feed intake
